# Supplementary material
Source: PubMed Central journal article supplement (PMC4601636)
Supplement: NIHMS716828-supplement-supplemental_doc.pdf [file NIHMS716828-supplement-supplemental_doc.pdf]

## Combining Active Immunization and Monoclonal Antibody Therapy to Facilitate Early Initiation of a Long-acting Anti-methamphetamine Antibody Response

Michael D. Hambuchen,<sup>†</sup> F. Ivy Carroll,<sup>‡</sup> Daniela Rüedi-Bettschen,<sup>†</sup> Howard P. Hendrickson,<sup>§</sup> Leah J. Hennings,<sup>||</sup> Bruce E. Blough,<sup>‡</sup> Lawrence E. Brieady,<sup>‡</sup> Ramakrishna R. Pidaparathi, and S. Michael Owens\*<sup>†</sup>.

<sup>†</sup>Department of Pharmacology and Toxicology, College of Medicine, University of Arkansas for Medical Sciences, Little Rock, AR, USA

<sup>‡</sup> Research Triangle Institute, Research Triangle Park, NC, USA

<sup>§</sup>Department of Pharmaceutical Sciences, College of Pharmacy, University of Arkansas for Medical Sciences, Little Rock, AR, USA

<sup>||</sup>Department of Pathology, University of Arkansas for Medical Sciences, Little Rock, AR, USA

### SUPPORTING INFORMATION

#### Analysis Appendix

| Compound  | Formula                                                                                                            | Calculated |      |      | Found |      |      |
|-----------|--------------------------------------------------------------------------------------------------------------------|------------|------|------|-------|------|------|
|           |                                                                                                                    | C          | H    | N    | C     | H    | N    |
| <b>3</b>  | C <sub>18</sub> H <sub>24</sub> ClNO                                                                               | 70.69      | 7.91 | 4.58 | 70.89 | 7.90 | 4.57 |
| <b>4</b>  | C <sub>19</sub> H <sub>23</sub> NO <sub>2</sub>                                                                    | 76.73      | 7.80 | 4.71 | 76.45 | 7.83 | 4.76 |
| <b>5</b>  | C <sub>19</sub> H <sub>25</sub> NO                                                                                 | 80.52      | 8.89 | 4.94 | 80.16 | 9.08 | 4.95 |
| <b>6</b>  | C <sub>11</sub> H <sub>17</sub> NO                                                                                 | 73.70      | 9.56 | 8.93 | 73.85 | 8.76 |      |
| <b>8</b>  | C <sub>15</sub> H <sub>23</sub> NO <sub>3</sub>                                                                    | 67.90      | 8.74 | 5.28 | 67.78 | 8.84 | 5.28 |
| <b>10</b> | C <sub>21</sub> H <sub>33</sub> NO <sub>5</sub>                                                                    | 66.46      | 8.76 | 3.69 | 66.17 | 8.64 | 3.94 |
| <b>12</b> | C <sub>36</sub> H <sub>60</sub> Cl <sub>2</sub> N <sub>4</sub> O <sub>4</sub> S <sub>2</sub> •2•H <sub>2</sub> O   | 55.15      | 8.23 | 7.15 | 55.22 | 8.19 | 7.08 |
| <b>15</b> | C <sub>36</sub> H <sub>60</sub> Cl <sub>2</sub> N <sub>4</sub> O <sub>4</sub> S <sub>2</sub> •1.5•H <sub>2</sub> O | 55.79      | 8.19 | 7.23 | 55.76 | 8.04 | 7.33 |
